# Supplementary material
Source: PubMed Central journal article supplement (PMC5018128)

**Biophysical Journal, Volume 111**

**Supplemental Information**

**Cation Interactions and Membrane Potential Induce Conformational  
Changes in NaPi-IIb**

**Monica Patti, Cristina Fenollar-Ferrer, Andreas Werner, Lucy R. Forrest, and Ian C.  
Forster**

## **IN SUPPORTING MATERIAL**

**Supporting data:** Structural models of flounder NaPi-IIb in outward-facing and inward-facing conformations. These models were constructed based on their homology with VcINDY. Note that the expected accuracy of the outward-facing model is likely to be higher than that of the inward-facing model.

Outward facing (also available at PMDB, with code PM0080462): NaPi-IIb Outward Facing

Inward facing: NaPi-IIb Inward Facing

**Figure S1 Alignment of VcINDY and flNaPi-IIb used for structural modeling.** Only regions contained in the model(s) are shown, i.e., excluding the N- and C-termini and a large extracellular loop after TM3 between the two structural repeats. The helical regions in the template VcINDY are shown as blue bars above the alignment, and the regions of predicted helicity in flNaPi-IIb are shown below the alignment; helices are labeled by transmembrane (TM) segment. Amino acids are colored by chemical property, namely acidic (red), basic (blue), polar (cyan), aromatic (gold), helix breaking (gray), while histidines are colored light green, and all other positions have a white background.

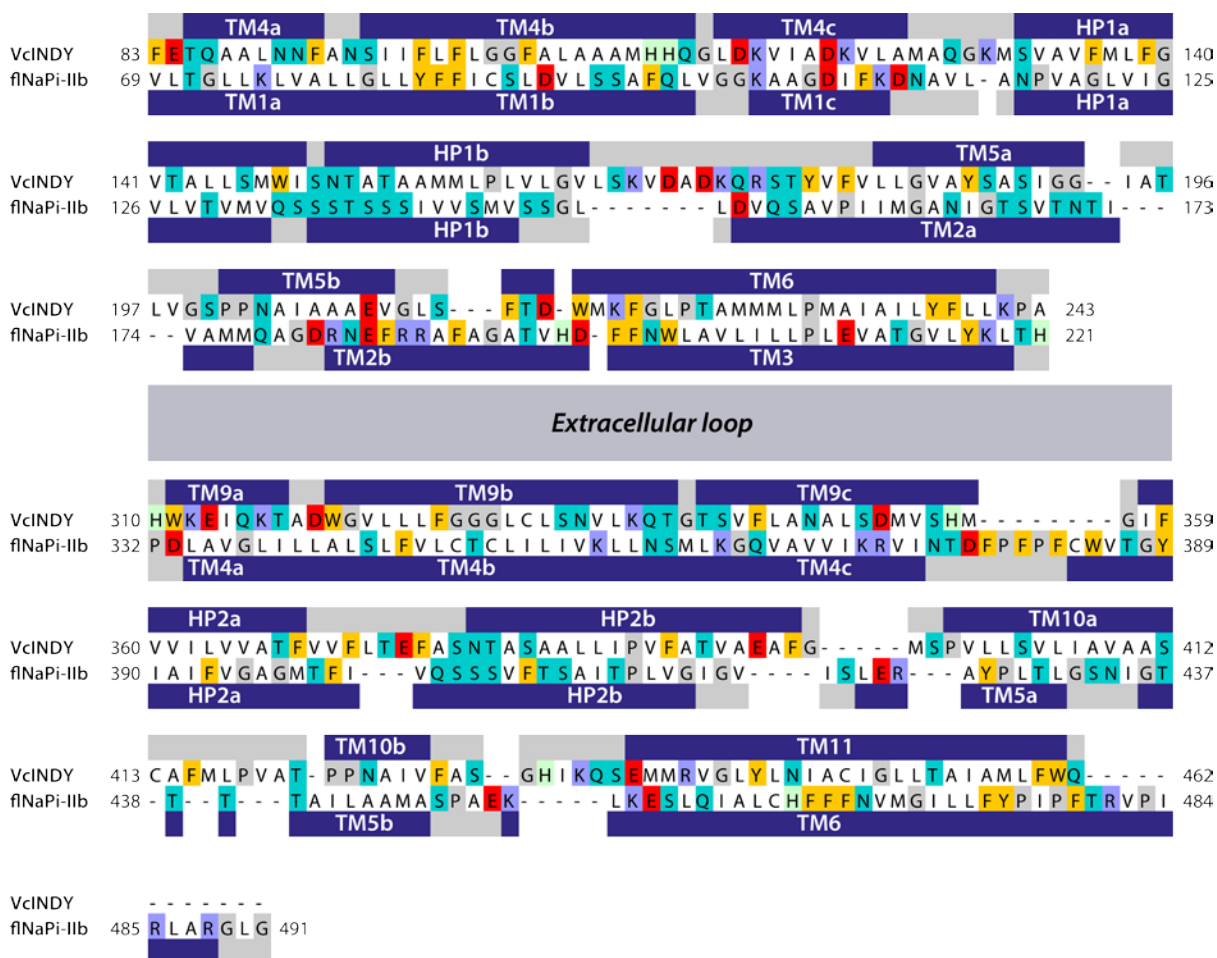

**Figure S2 Steady-state electrogenic characteristics of Na1 mutants.**

A) Confirmation that apparent  $P_i$ -affinity ( $K_{0.5}^{P_i}$ ) was only marginally affected by the mutagenesis. Each data point is the pool from 4-5 representative oocytes. To determine the apparent affinity constant for  $P_i$  ( $K_{0.5}^{P_i}$ ) the electrogenic response to different  $P_i$  concentrations added to the 100Na control solution was measured at a defined membrane potential. Oocytes were voltage-clamped to  $V_h = -60$  mV and voltage steps were applied in the range  $-160$  to  $+60$  mV for typically 100 ms. To measure  $P_i$ -induced currents ( $I_{P_i}$ ), the superfusate was switched from the control (100Na) solution to one containing a given concentration of  $P_i$  and when the holding current had reached a steady-state, the voltage steps were repeated. The control data set was subtracted from the data set obtained in the presence of  $P_i$  to give  $I_{P_i}$  for each  $[P_i]$  and test voltage. Estimates of  $K_{0.5}^{P_i}$  were obtained by fitting data with a form of the Michaelis-Menten equation given by:

$$I_{P_i} = I_{P_i}^{\max} [P_i] / ([P_i] + K_{0.5}^{P_i}) + I_{\text{OFF}} \quad (\text{S1})$$

where  $I_{P_i}^{\max}$  is the maximum current attainable,  $I_{\text{OFF}}$  is a variable offset to account for uncoupled leak effects (25). To take account of the differences in expression levels between individual oocytes, data obtained from each oocyte were normalized to  $I_{P_i}$  recorded at  $-100$  mV with 100Na and 1 mM  $P_i$  before pooling and fitting the data with Eqn. 1.

B) Comparison of activation indices for human and flounder mutants. The activation index is based on a two point assay and provides a means to determine if significant deviations from WT behavior have occurred following mutagenesis (e.g.(2)). Data for hNaPi-IIa were taken from (2) and replotted.

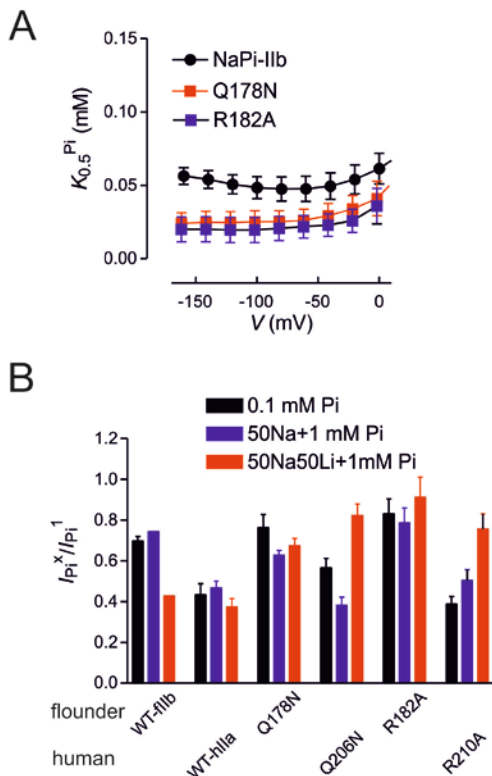

**Figure S3**

**Current voltage ( $I$ - $V$ ) data for all constructs investigated in this study.** The data were normalized to the response to 1 mM  $P_i$  at  $-100$  mV for superfusion with 100Na solution. Each data point is mean  $\pm$  sem for  $n > 5$  oocytes. In each case, normalised data for the WT flNaPi-IIb for superfusion in 100Na in response to 1 mM  $P_i$  have been superimposed (open squares).

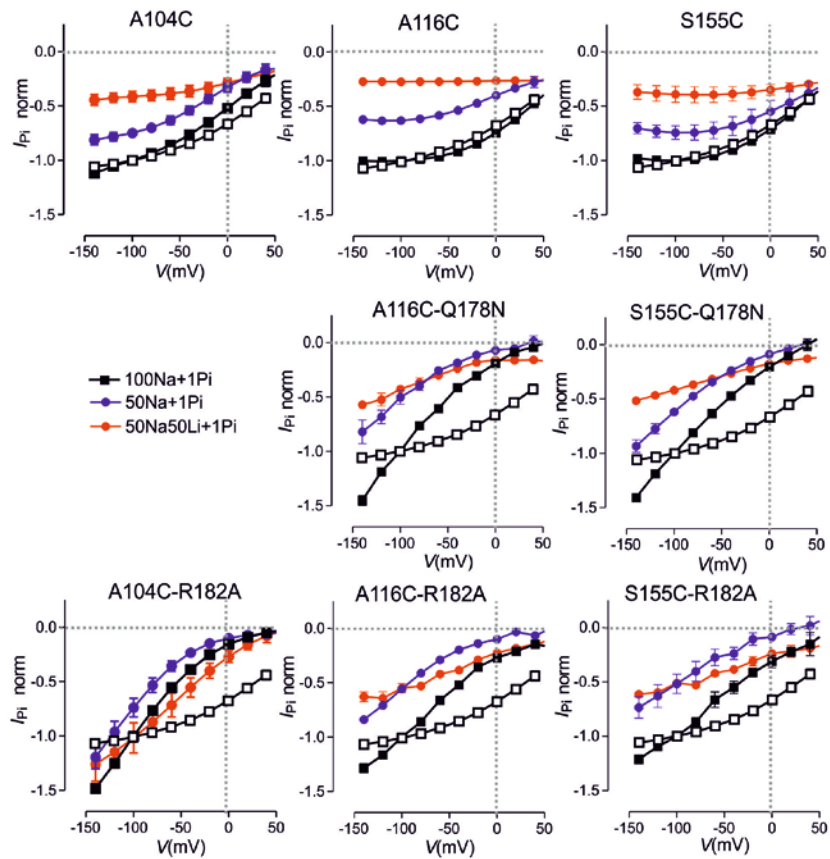

### Figure S4

**Voltage dependence of relaxation time constants for the WT and double mutants.** Data were obtained by fitting exponentials to the presteady-state relaxation currents for two superfusion conditions. Note that the magnitude of  $\tau_{ON}^0$  is less than we obtained for the VCF recordings (Fig. 6) because these data were obtained at a higher temperature (approx. 22 °C) compared with 19-20° for the former measurements. Data points pooled from  $n > 4$  oocytes for each construct and points joined for graphical convenience only.

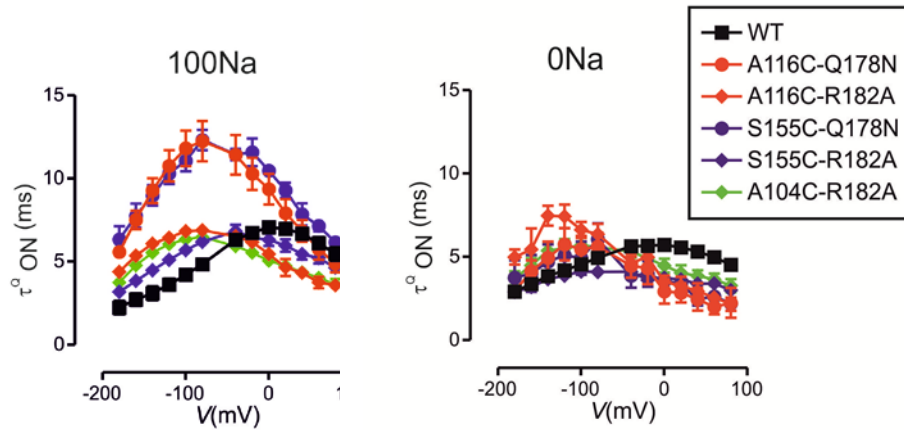

### Figure S5. Quenching by $I^-$

A) Recordings of  $\Delta F$  made from a representative oocyte expressing the labeled mutant S155C in response to voltage steps according to the standard protocol. Baseline correction was made for all traces at the  $-60$  mV holding potential. Red traces are response at  $+180$  mV.

B)  $\Delta F$  vs  $V$  for data traces in A. These data confirm that exposure to  $I^-$  does not lead to any irreversible change in the  $\Delta F$ - $V$  characteristic.

(C) Iodide quenching displays a linear Stern-Volmer relationship.  $\Delta F$ - $V$  data were acquired from oocytes expressing A116C or S155C and labeled with MTS-TAMRA. Data were fit with a single Boltzmann function (Eqn 1) to yield the maximum change in voltage-dependent fluorescence before and after exposure to a range of  $[I^-]$ . The data are plotted as  $\Delta F_{\max}^0/\Delta F_{\max}$  vs  $[I^-]$  to yield a Stern-Volmer plot, where  $\Delta F_{\max}^0$  is the mean of  $\Delta F_{\max}$  before and after each exposure to  $I^-$ . Each data point is the mean  $\pm$  sem from 4 oocytes. Linear regression fits reported slopes of  $6.65 M^{-1}$  (A116C) and  $6.08 M^{-1}$  (S155C) and represent the respective Stern-Volmer quenching constants (e.g. (19)).

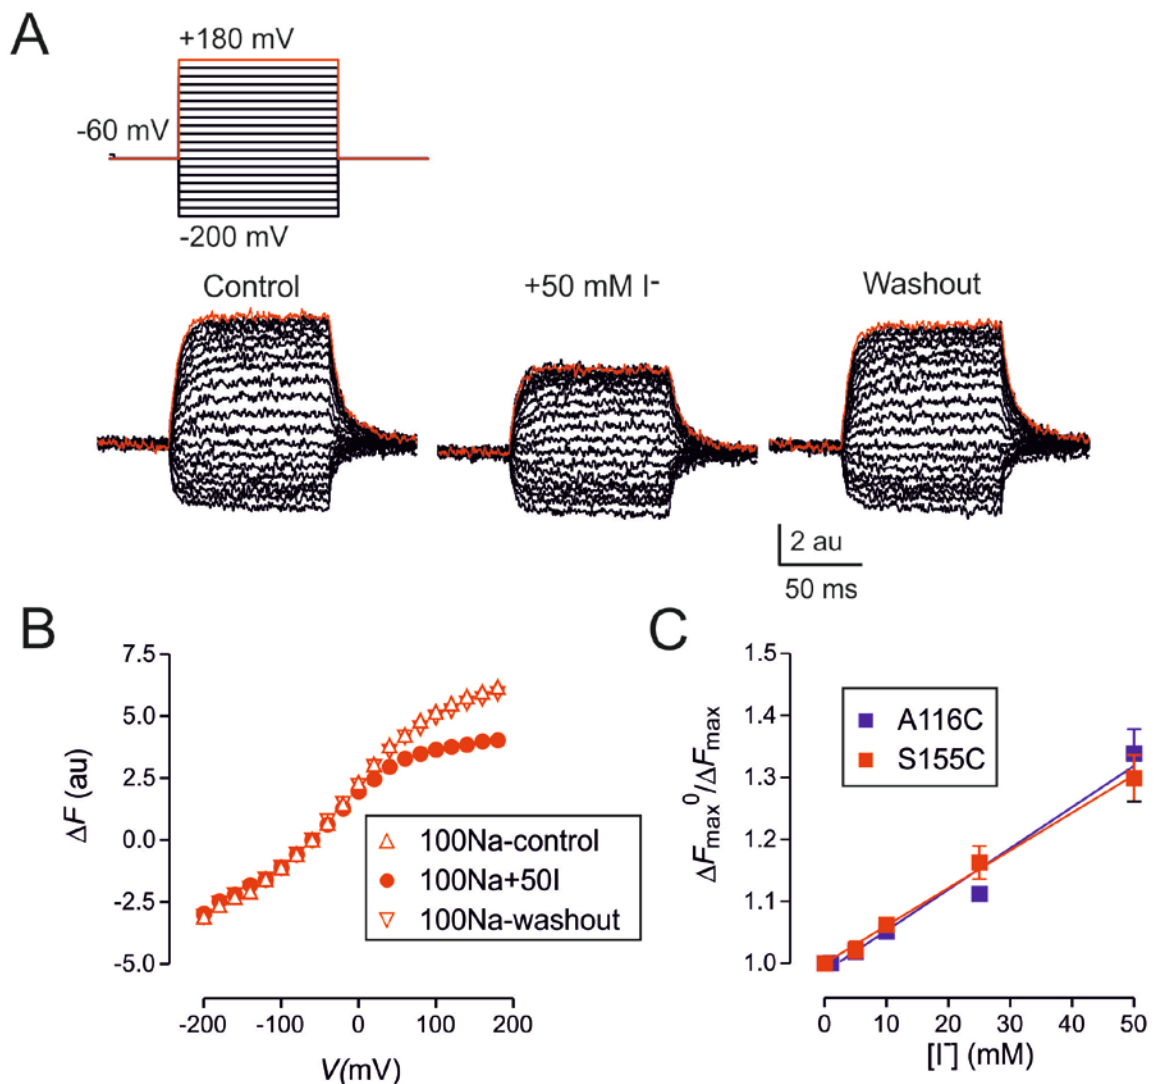

Supplement: mmc1.pdf [file mmc1.pdf]
